# Supplementary material for: High-Resolution DNA Copy Number Profiling of Malignant Peripheral Nerve Sheath Tumors Using Targeted Microarray-Based Comparative Genomic Hybridization
Source: Oxford University Press journal article supplement (doi:10.1158/1078-0432.ccr-07-1305), 2008-02-15
Supplement: 10780432ccr071305-sup-supplementary_table_s2.xls [file 10780432ccr071305-sup-supplementary_table_s2.xls]

## Sheet: Sheet1
Supplementary table-2. List of genes included on the MPNST microarray.
Sl.no	Chromo-some	Locus	Gene	Gene description	Exons	No. of data points spanning the gene
1	1	1p36.3	TP73	tumor protein p73	14	8
2	1	1q22	MPZ	myelin protein zero	7	6
3	1	1p33-p34	PTCH2	patched homolog 2	22	13
4	1	1p32-p31	JUN	v-jun sarcoma virus 17 oncogene homolog	1	3
5	1	1q32	MDM4 / MDMX	transformed 3T3 cell double minute 4, p53 binding protein	11	6
6	1	1p36.2	mTOR / FRAP1	FK506 binding protein 12-rapamycin associated protein 1	58	31
7	2	2p21	CYP1B1	cytochrome P450, family 1, subfamily B, polypeptide 1	3	9
8	2	2q34	FN1	fibronectin 1	45	24
9	3	3p26.1	L1CAM2	cell adhesion molecule with homology to L1CAM	28	21
10	3	3p25	TIMP4	TIMP metallopeptidase inhibitor 4	5	5
11	4	4q21-q25	SPP1	secreted phosphoprotein 1	7	6
12	4	4q12-q13	CXCL5	chemokine (C-X-C motif) ligand 5	4	3
13	4	4q13-q21	IL8	interleukin 8	4	3
14	4	4q11-q13	PDGFRA	platelet-derived growth factor receptor, alpha polypeptide	23	13
15	5	5p15.33	TERT	telomerase reverse transcriptase	16	12
16	5	5q33.2-qter	HMMR / RHAMM	hyaluronan-mediated motility receptor	18	12
17	5	5q34-q35	FLT4 / VEGFR3	tyrosine kinase 4	30	13
18	5	5q31.1	EGR1 / KROX24	early growth response 1	2	3
19	6	6q16.1	EPHA7	EPH receptor A7 (ephrin receptor A7)	17	12
20	6	6q22-q23	BLBP / FABP7	fatty acid binding protein 7, brain	4	4
21	6	6p21.2	CDKN1A / p21 / MDA-6	cyclin-dependent kinase inhibitor 1A	3	7
22	7	7p12	EGFR	epidermal growth factor receptor	28	19
23	7	7q36	SHH	sonic hedgehog homolog	3	9
24	7	7q21.1	HGF	hepatocyte growth factor	18	13
25	7	7q31	MET	met proto-oncogene (hepatocyte growth factor receptor)	21	14
26	8	8q22.1	CCNE2	cyclin E2	12	13
27	8	8p22-p21	TNFRSF10B / TRAILR2	tumor necrosis factor receptor superfamily, member 10b	9	8
28	8	8p21	TNFRSF10A / TRAILR1	tumor necrosis factor receptor superfamily, member 10a	10	4
29	9	9p21	p16-INK4a_CDKN2A	cyclin-dependent kinase inhibitor 2A	3	6
30	9	9q34	TSC1	tuberous sclerosis 1	23	10
31	10	10q25-qter	MKI-67	antigen identified by monoclonal antibody Ki-67	15	13
32	10	10q23.3	PTEN	phosphatase and tensin homolog	9	16
33	11	11q22.3	MMP13	matrix metallopeptidase 13 (collagenase 3)	10	12
34	11	11q13	Cyclin D1 / CCND1	cyclin D1 (PRAD1: parathyroid adenomatosis 1)	5	10
35	12	12p13	FOXM1	forkhead box M1	9	10
36	12	12q12-q13.1	DHH	desert hedgehog homolog (Drosophila)	3	5
37	12	12q13	ERBB3	v-erb-b2 erythroblastic leukemia viral oncogene homolog 3 (avian)	28	17
38	12	12p12.1	KRAS OR RASK	v-Ki-ras2 Kirsten rat sarcoma viral oncogene homolog	5	23
39	12	12q13.2-q13.3	GLI1	glioma-associated oncogene homolog (zinc finger protein)	12	9
40	12	12p13.1-p12	CDKN1B / p27	cyclin-dependent kinase inhibitor 1B (p27, Kip1)	3	5
41	13	6p21	OSF2	runt-related transcription factor 2	23	16
42	13	13q14.2	RB1	retinoblastoma 1 (including osteosarcoma)	27	21
43	14	14q11.2	CMA1	chymase 1, mast cell	5	3
44	14	14q24.3	FOS	v-fos FBJ murine osteosarcoma viral oncogene homolog	4	3
45	14	14q32.33	HSPCA	heat shock 90kDa protein 1, alpha	12	17
46	16	16p13.3	TSC2	tuberous sclerosis 2	41	21
47	17	17q25	BIRC5	baculoviral IAP repeat-containing 5 (survivin)	4	5
48	17	17q21-q22	TOP2A	topoisomerase (DNA) II alpha 170kDa	39	15
49	17	17q25	ITGB4	integrin, beta 4	40	17
50	17	17p13.1	TP53	tumor protein p53 (Li-Fraumeni syndrome)	11	9
51	17	17q11.2	NF1	neurofibromin 1	57	23
52	19	19q13.1	TGFB1	transforming growth factor, beta 1	7	9
53	20	20q11.2-q13.1	MMP9	matrix metallopeptidase 9	13	5
54	20	20p11	FOXA2 / HNF3B	forkhead box A2	3	5
55	20	20pter-p12.1	RASSF2	Ras association (RalGDS/AF-6) domain family 2	12	11
56	21	21q22.3	S100B	S100 calcium binding protein, beta (neural)	3	7
57	22	22q13.1	SOX10	SRY (sex determining region Y)-box 10	5	12
