# Supplementary material for: High-Resolution DNA Copy Number Profiling of Malignant Peripheral Nerve Sheath Tumors Using Targeted Microarray-Based Comparative Genomic Hybridization
Source: Oxford University Press journal article supplement (doi:10.1158/1078-0432.ccr-07-1305), 2008-02-15
Supplement: 10780432ccr071305-sup-supplementary_table_s4.xls [file 10780432ccr071305-sup-supplementary_table_s4.xls]

## Sheet: Sheet1
Supplementary table-4
Details of primers for quantitative real time PCR
Gene	Upper primer	Lower primer
CCND1	TTGCTGCTATTGGAGGATCAGTT	ATGGCAGTATATGACATTGTAAAACAAA
EGFR	CAGTGTGGCTGCCTGAATCA	CAGCTGGCTAAGCACCTGTG
HGF	CCCACCATTATCCAGCAGCTA	GGAGTGACTTGACCCTGGTTGT
RHAMM_1	CAGTGAAACAGTCTCCGCCC	CAGTATTCCCCGCCTGAATG
RHAMM_2	GCGAGACTCAGTCTCTCCAAAAA	CTACTGTGCCCGGCTGTCTT
RHAMM_3	ACACACTGTGCCCAAGGTGA	CTCCAGTCAGCCCCATTCAT
L1CAM_1	AAGTGTCTGGCACAGCAGGA	CCAGTGCATGTAACCACCACA
L1CAM_2	GGAGCGCTGGAGTACAGTGG	GAGTTCGAGGTTGCAGTGAGC
MET_1	AGAAAAAGGGCAGGTCGCTT	GTTTGGACTTGCTGCTCTTGC
MET_2	GCTCAGTGGTACATGCGCAG	CCTGTGGCACGAGTTTACCTATG
MET_3	CCACCACAGTCCCCAGAGTG	AGATCACATGAACACAGGAAGGG
p16_1	GGTCTCATTCACCTTGGCGT	TGCGTGATCAGCCCTGTTC
p16_2	GTGCAGAAGAGCCGAGATCG	CAATTGTGCGTGGCATCATC
p16_3	AAAACTCCCCAGGAAGCCTC	CAGGTAGCGCTTCGATTCTCC
PDGFRA_1	GTGGCACCAGAAGGCACTTT	CAGAGCGAGACTCTTGTCACACA
PDGFRA_2	ACCTGCTTTTCCATGCCCT	GAGAACCTGCTGGATCCCAAG
RB_1	TGGTCCTGGTCGTCCCTATC	TTTAGACCTGAGGTATTGACGAAGG
RB_2	TAGCCCAAGGATCAAGTGGAA	AGGGTGCTCGATTAAAGCTCC
TERT_1	TTGCCTGTCCTGAGTGACCC	TCGACACCGTGTCACCTACG
TERT_2	TCCAAGGACGGAGCGTAGC	TCCTTGTGTTCATTGGCCTG
